# Supplementary material for: The Effect of Carbohydrate Intake on Strength and Resistance Training Performance: A Systematic Review
Source: Nutrients. 2022 Feb 18;14(4):856. doi: 10.3390/nu14040856 (PMC8878406; doi:10.3390/nu14040856)
Supplement: Supplementary file 1 [file nutrients-14-00856-s001.zip › nutrients-1588576-supplementary.pdf]

# Appendix: systematic search strategy

## MEDLINE & SPORTDiscus via EBSCOhost

Date: from 1979 (earliest possible in EBSCOhost) until 31<sup>th</sup> Dec 2021.

| #  | Query                                                                                                                                                                                                                                                                                                                                            | Limiters/Expanders                         | Results   |
|----|--------------------------------------------------------------------------------------------------------------------------------------------------------------------------------------------------------------------------------------------------------------------------------------------------------------------------------------------------|--------------------------------------------|-----------|
| S4 | S1 AND S2 AND S3                                                                                                                                                                                                                                                                                                                                 | Search modes –<br>Find all my search terms | 608       |
| S3 | (MH "Muscle Strength") OR (strength OR 1RM OR performance OR failure OR power OR "total work" OR torque OR force OR volume OR repetitions)                                                                                                                                                                                                       | Search modes –<br>Find all my search terms | 4,299,030 |
| S2 | MH "Resistance Training" OR MH "Weight Lift*" OR (isokinetic OR "strength training" OR "strength exercise*" OR "resistance training" OR "resistance exercise*" OR powerlift* OR weightlift* OR "power lift" OR Crossfit)                                                                                                                         | Search modes –<br>Find all my search terms | 69,390    |
| S1 | (MH "Carbohydrates") OR ("glycogen depletion" OR "high carbohydrate" OR "low carbohydrate" OR keto* OR (maltodextrin N2 (supplement* OR intake) OR (glucose N2 (ingestion OR intake OR supplement) OR (carbohydrate* N6 (intake* OR supplement* OR manipul* OR consumption OR ingestion OR feeding OR restricti* OR diet OR drink OR breakfast)) | Search modes –<br>Find all my search terms | 196,870   |

## SciELO

Date: until 31<sup>th</sup> Dec 2021.

("glycogen depletion" OR carbohydrate\* OR keto\* OR maltodextrin OR glucose OR breakfast) AND (isokinetic OR "strength training" OR "resistance training" OR "resistance exercise\*" OR powerlift\* OR weightlift\* OR "power lift" OR Crossfit) AND (strength OR 1RM OR performance OR failure OR power\* OR "total work" OR torque OR force OR volume OR repetitions)

Results: 20
